# Supplementary material for: Preferences for End-of-life Care among Terminal Cancer Patients in China: A Discrete Choice Experiment
Source: Research Square preprint supplement (doi:10.21203/rs.3.rs-457931/v1), 2021-04-26
Supplement: Supplementary file 1 [file 17a33eac35c24a1fd347410f.docx]

**Appendix 1. Supplemental Material**
